# Supplementary material for: Multimethod determination of the below-cloud wet scavenging coefficients of aerosols in Beijing, China
Source: Copernicus journal article supplement (doi:10.5194/acp-2019-680), 2019-08-01
Supplement: Supplementary file 1 [file acp-2019-680-supplement.pdf]

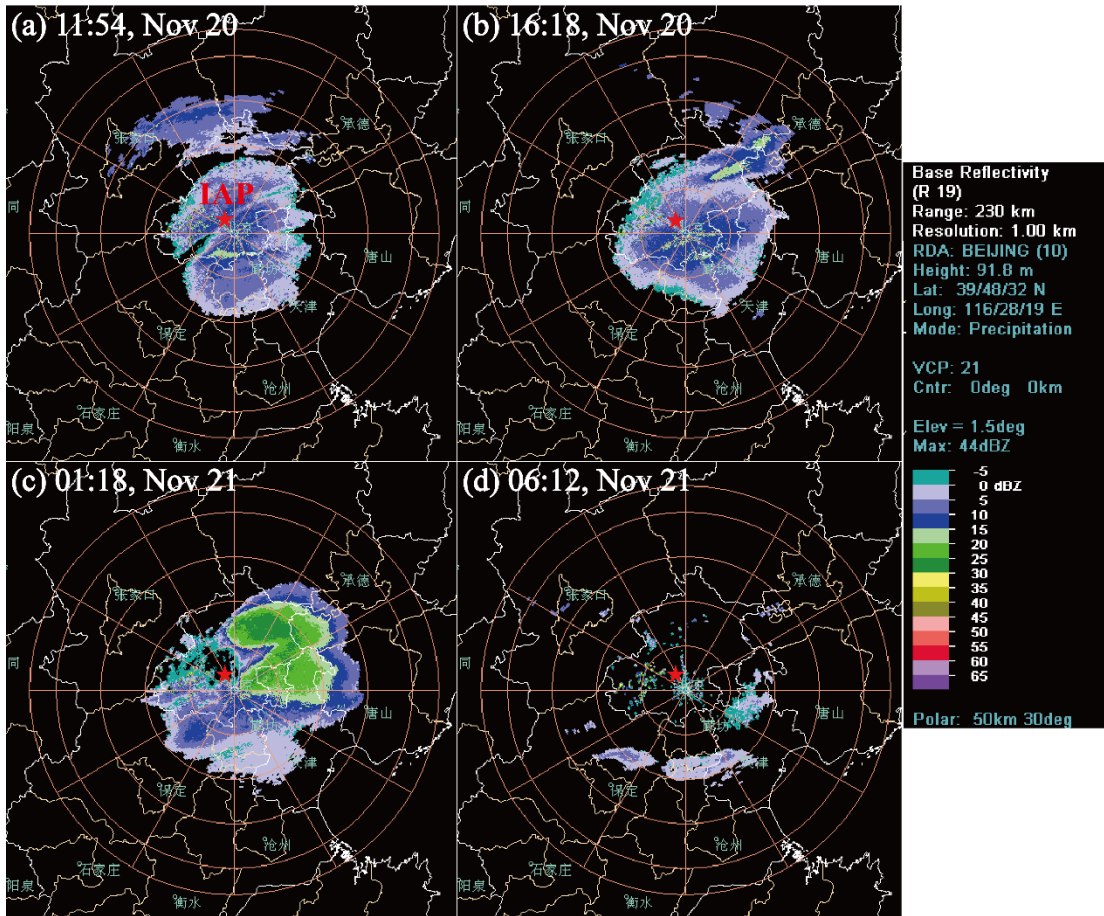

1

2 **Figure s1. The radar base reflectivity during the rainfall event (the sampling site at the IAP is**  
 3 **indicated by the red star).**

4

5 **ABBREVIATIONS**

| Nomenclature |                                       |          |                                    |
|--------------|---------------------------------------|----------|------------------------------------|
| $d_p$        | aerosol particle diameter             | $F$      | aerosol flux                       |
| $D_p$        | raindrop diameter                     | $D_{ep}$ | wet deposition                     |
| $N(d_p)$     | aerosol particle number concentration | $C_p$    | concentration in the precipitation |

|               |                                                       |                       |                                                                                          |
|---------------|-------------------------------------------------------|-----------------------|------------------------------------------------------------------------------------------|
| $N(D_p)$      | concentration of raindrops                            | $C_{a0}$              | original aerosol concentration before the rainfall                                       |
| $K(d_p)$      | size-resolved below-cloud scavenging coefficient      | $C_a(0)$              | aerosol concentration at the surface                                                     |
| $K$           | below-cloud scavenging coefficient                    | $C_a(z)$              | aerosol concentration at height $z$                                                      |
| $U_i(D_p)$    | falling velocity of raindrops                         | $C_{p, \text{below}}$ | washout concentration                                                                    |
| $E(D_p, d_p)$ | collision efficiency                                  | $P$                   | precipitation intensity                                                                  |
| $A$           | horizontal area of the given box                      | $h'(z)$               | depth of the layers in the vertical direction                                            |
| $h$           | vertical height of the given box or cloud-base height | $f$                   | vertical distribution of aerosols                                                        |
| $M$           | aerosol mass of the given box                         | $C'_a(0)$             | aerosol concentration at the surface and eliminates effects of north and north-west wind |
| $C_a$         | average aerosol concentration                         |                       |                                                                                          |
