# Supplementary material for: Multimethod determination of the below-cloud wet scavenging coefficients of aerosols in Beijing, China
Source: Copernicus journal article supplement (doi:10.5194/acp-2019-680), 2019-08-01
Supplement: Supplementary file [file acp-2019-680-AC3-supplement.zip]

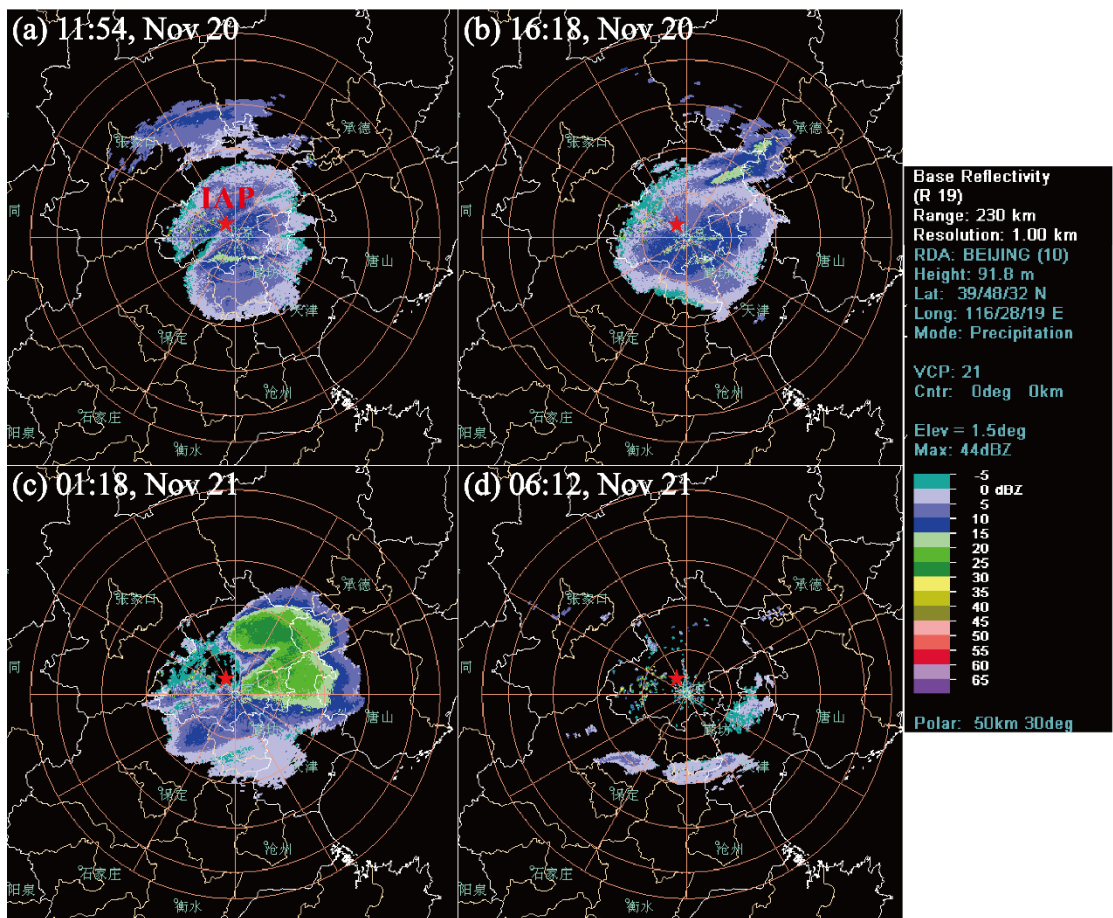

**Figure s1. The radar base reflectivity during the rainfall event (the sampling site at the IAP is indicated by the red star).**

The Figure. s2 shows the average concentrations of SNA in summer of 2014 (Box and whisker plot) and this rain event in winter of APHH-Beijing campaign. The VWA concentrations are no more than 30, 40 and 15  $\text{mg L}^{-1}$  for  $\text{NO}_3^-$ ,  $\text{SO}_4^{2-}$  and  $\text{NH}_4^+$ , respectively, and decreased sharply during the beginning of rainfall and remained at low levels during the event. The in-cloud scavenging process is considered as the median value of the concentrations after accumulated precipitation exceeds 5 mm. These values were 2.75, 3.33, and 2.51  $\text{mg L}^{-1}$  for  $\text{NO}_3^-$ ,  $\text{SO}_4^{2-}$  and  $\text{NH}_4^+$ , respectively, in summer of 2014 (as shown in Figure. s2 marked in grey shadow) (Xu et al., 2017).

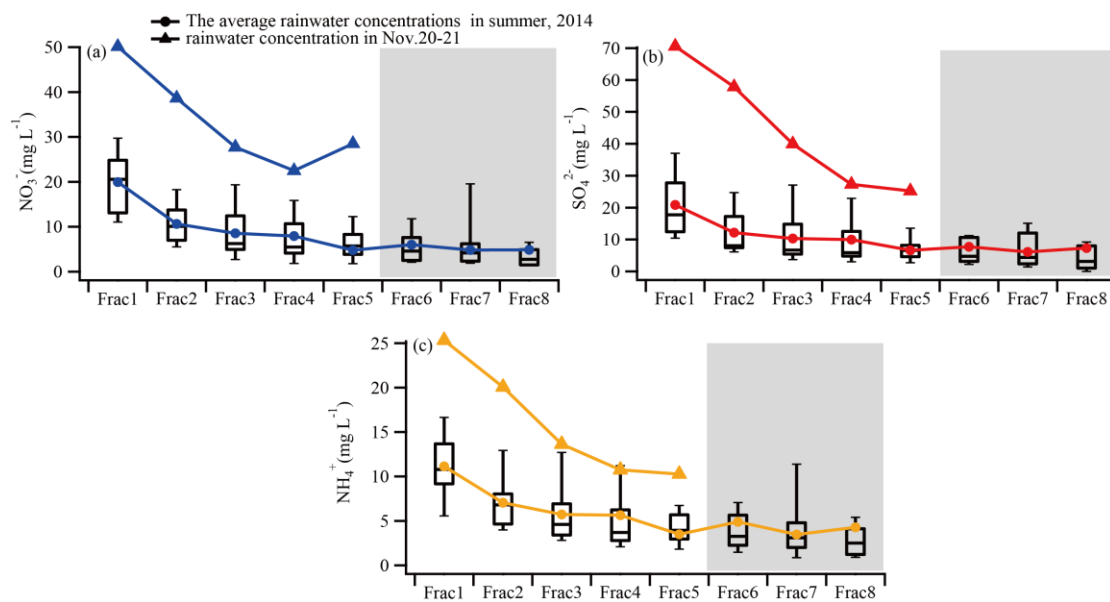

**Figure s2. Evolution of the (a)  $\text{NO}_3^-$  (blue), (b)  $\text{SO}_4^{2-}$  (red) and (c)  $\text{NH}_4^+$  (orange) of precipitation during summer 2014 and November 20<sup>th</sup> to 21<sup>st</sup> within different precipitation fractions of several sampled precipitation events (The data show the lowest, lowest 25 percentiles, median highest quartile, highest 75 percentiles, and highest value, respectively).**

26 **Table s1. The observation dataset list**

| Observation instrument                    | Abbreviation | Introduction                                                                                                                                                                                                    |
|-------------------------------------------|--------------|-----------------------------------------------------------------------------------------------------------------------------------------------------------------------------------------------------------------|
|                                           |              | (time resolution and mainly measured material)                                                                                                                                                                  |
| Ion Chromatography                        | IC           | anions ( $\text{SO}_4^{2-}$ , $\text{NO}_3^-$ , $\text{Cl}^-$ and $\text{F}^-$ ) and cations ( $\text{NH}_4^+$ , $\text{Na}^+$ , $\text{K}^+$ , $\text{Ca}^{2+}$ and $\text{Mg}^{2+}$ ) in the rainfall samples |
| Ambient Ion Monitor-Ion Chromatograph     | AIM-IC       | 60 min resolution, $\text{PM}_{2.5}$ concentrations                                                                                                                                                             |
| Scanning Mobility Particle Sizer          | SMPS         | 5 min resolution, 14-740 nm particle number concentration                                                                                                                                                       |
| Single-particle Aerosol Mass Spectrometer | SPAMS        | 60 min resolution, 0.2-2.5 $\mu\text{m}$ particle number concentration, mainly focus on $\text{NO}_3^-$ , $\text{SO}_4^{2-}$ and $\text{NH}_4^+$                                                                |
| Polarization Optical Particle Counter     | POPC         | 5 min resolution, 0.4-10.35 $\mu\text{m}$ particle number concentration                                                                                                                                         |

27

28

29

30

31

32

33

34

35

36

37

38

39

| Nomenclature  |                                                       |                       |                                                                                          |
|---------------|-------------------------------------------------------|-----------------------|------------------------------------------------------------------------------------------|
| $d_p$         | aerosol particle diameter                             | $F$                   | aerosol flux                                                                             |
| $D_p$         | raindrop diameter                                     | $D_{ep}$              | wet deposition                                                                           |
| $N(d_p)$      | aerosol particle number concentration                 | $C_p$                 | concentration in the precipitation                                                       |
| $N(D_p)$      | concentration of raindrops                            | $C_{a0}$              | original aerosol concentration before the rainfall                                       |
| $K(d_p)$      | size-resolved below-cloud scavenging coefficient      | $C_a(0)$              | aerosol concentration at the surface                                                     |
| $K$           | below-cloud scavenging coefficient                    | $C_a(z)$              | aerosol concentration at height $z$                                                      |
| $U_i(D_p)$    | falling velocity of raindrops                         | $C_{p, \text{below}}$ | washout concentration                                                                    |
| $E(D_p, d_p)$ | collision efficiency                                  | $P$                   | precipitation intensity                                                                  |
| $A$           | horizontal area of the given box                      | $h'(z)$               | depth of the layers in the vertical direction                                            |
| $h$           | vertical height of the given box or cloud-base height | $f$                   | vertical distribution of aerosols                                                        |
| $M$           | aerosol mass of the given box                         | $C'_a(0)$             | aerosol concentration at the surface and eliminates effects of north and north-west wind |
| $C_a$         | average aerosol concentration                         | BWSC                  | below-cloud wet scavenging coefficient                                                   |
| APHH-Beijing  | Atmospheric Pollution and Human Health-Beijing        | CTMs                  | Chemical Transport Models                                                                |

|           |                                                          |         |                                                   |
|-----------|----------------------------------------------------------|---------|---------------------------------------------------|
| MICS-Asia | Model Inter-Comparison Study for Asia                    | TF-HTAP | Hemispheric Transport of Atmospheric Pollutants   |
| VWA       | volume weighted averaged                                 | NCP     | North China Plain                                 |
| IAP       | Institute of Atmospheric Physics                         | IC      | Ion Chromatography                                |
| AIM-IC    | Ambient Ion Monitor-Ion Chromatograph                    | SMPS    | Scanning Mobility Particle Sizer                  |
| SPAMS     | Single-particle Aerosol Mass Spectrometer                | POPC    | Polarization Optical Particle Counter             |
| SNA       | $\text{NO}_3^-$ , $\text{SO}_4^{2-}$ and $\text{NH}_4^+$ | NAQPMS  | the Nested Air Quality Prediction Modeling System |
| NAAQS     | the National Ambient Air Quality Standard                | CAMx    | Comprehensive Air Quality Model with Extensions   |
| CMAQ      | Community Multi-scale Air Quality modeling system        | CNEMC   | China National Environmental Monitoring Centre    |
